# Supplementary material for: Reduced efficacy of selection in regions of the Drosophila genome that lack crossing over
Source: PubMed Central journal article supplement (PMC1852418; doi:10.1186/gb-2007-8-2-r18), 2007-02-06
Supplement: gb-2007-8-2-r18-S1.pdf [file gb-2007-8-2-r18-S1.pdf]

Additional data file 1: GC content and divergence for short ( $\leq 80$  bp) and long ( $> 80$  bp) intron classes in the different recombination regions.

| Rec. region  | Intron size class | GC content          | Divergence          |
|--------------|-------------------|---------------------|---------------------|
| High         | Short             | 0.352 (0.349/0.355) | 0.301 (0.297/0.305) |
|              | Long              | 0.403 (0.400/0.405) | 0.114 (0.112/0.116) |
| Intermediate | Short             | 0.355 (0.350/0.359) | 0.291 (0.286/0.296) |
|              | Long              | 0.402 (0.399/0.405) | 0.123 (0.121/0.127) |
| Low          | Short             | 0.390 (0.385/0.396) | 0.287 (0.280/0.296) |
|              | Long              | 0.412 (0.408/0.417) | 0.132 (0.126/0.139) |
| $N_O$        | Short             | 0.356 (0.304/0.405) | 0.321 (0.272/0.393) |
|              | Long              | 0.361 (0.320/0.384) | 0.227 (0.190/0.299) |
| $N_4$        | Short             | 0.213 (0.195/0.233) | 0.256 (0.231/0.286) |
|              | Long              | 0.329 (0.315/0.341) | 0.271 (0.256/0.294) |
| $N_A$        | Short             | 0.243 (0.220/0.264) | 0.269 (0.243/0.296) |
|              | Long              | 0.336 (0.321/0.348) | 0.262 (0.245/0.282) |

Values reported are means per site, corrected for multiple hits [50], with 95% confidence intervals obtained by bootstrapping by intron. The no crossing over region is divided as follows:  $N_O$  = non-fourth chromosome genes,  $N_4$  = fourth chromosome genes,  $N_A$  = all no crossing over region genes.
