# Supplementary material for: Reduced efficacy of selection in regions of the Drosophila genome that lack crossing over
Source: PubMed Central journal article supplement (PMC1852418; doi:10.1186/gb-2007-8-2-r18), 2007-02-06
Supplement: gb-2007-8-2-r18-S2.pdf [file gb-2007-8-2-r18-S2.pdf]

Additional data file 2: Division of data into recombination classes, based on cytological location [see 51]

| Chromosome | Cytological location | Sequence coordinates | Recombination class | Gene boundaries <sup>a</sup> |
|------------|----------------------|----------------------|---------------------|------------------------------|
| X          | Up to 1B4            | 1 – 342892           | No                  | None                         |
|            | 1B5 to 3C2           | 342892 – 2764070     | Low                 | CG13366 / CG14419            |
|            | 3C3 to 15F1-3        | 2764070 – 17047156   | High                | CG14423 / CG12995            |
|            | 15F4 to 19D3         | 17047156 – 20415661  | Intermediate        | CG5162 / CG18492             |
|            | 19E1 to 20C1         | 20415661 – 21887054  | Low                 | CG1829 / CG17599             |
|            | 20C2 to 20F4         | 21887054 – 22714666  | No                  | CG12446 / CG9559             |
| 2L         | Up to 22A1           | -204334 – 1428804    | Low                 | CG11912 / CG31659            |
|            | 22A2 to 31A1         | 1428804 – 10056945   | High                | CG33128 / CG13127            |
|            | 31A2 to 38A1         | 10056945 – 19717726  | Intermediate        | CG4799 / CG10443             |
|            | 38A2 to 40C1         | 19717726 – 21934144  | Low                 | CG10628 / CG11634            |
|            | 40C2 to 40F7         | 21934144 – 22557853  | No                  | CG10834 / CG12775            |
| 2R         | Up to 41E1           | -31698 – 743919      | No                  | None                         |

|    |               |                     |              |                   |
|----|---------------|---------------------|--------------|-------------------|
|    | 41E2 to 42F3  | 743919 – 2692486    | Low          | CG2682 / CG11060  |
|    | 43A1 to 50F9  | 2692486 – 9904354   | Intermediate | CG30385 / CG8422  |
|    | 51A1 to 59F8  | 9904354 – 19294758  | High         | CG10104 / CG5532  |
|    | 60A1 to 60F5  | 19294758 – 20941487 | Low          | CG13561 / CG30429 |
| 3L | Up to 62A12   | -315927 – 1694342   | Low          | CG6821 / CG12011  |
|    | 62B1 to 71A1  | 1694342 – 14853328  | High         | CG18171 / CG17839 |
|    | 71A2 to 77E1  | 14853328 – 20578766 | Intermediate | CG13466 / CG4786  |
|    | 77E2 to 80A1  | 20578766 – 22695409 | Low          | CG4717 / CG32451  |
|    | 80A2 to 80F9  | 22695409 – 23790248 | No           | CG14448 / CG32230 |
| 3R | Up to 81F2    | -224037 – -132221   | No           | None              |
|    | 81F3 to 84B1  | -132221 – 2811817   | Low          | CG18090 / CG2047  |
|    | 84B2 to 89F4  | 2811817 – 13082065  | Intermediate | CG1982 / CG4135   |
|    | 90A1 to 99F1  | 13082065 – 26191519 | High         | CG31419 / CG18404 |
|    | 99F2 to 100F5 | 26191519 – 28686604 | Low          | CG1469 / CG1483   |

---

|   |                |                |    |                   |
|---|----------------|----------------|----|-------------------|
| 4 | 101F1 to 102F8 | 9362 – 1984823 | No | CG17245 / CG33653 |
|---|----------------|----------------|----|-------------------|

---

<sup>a</sup> indicates the distal and proximal genes analysed in each of the recombination categories.
